# Supplementary material
Source: Springer Nature journal article supplement (https://www.springermedizin.de/resource/supplementary/13054_2009_8307_MOESM1_ESM.pdf/9731670)

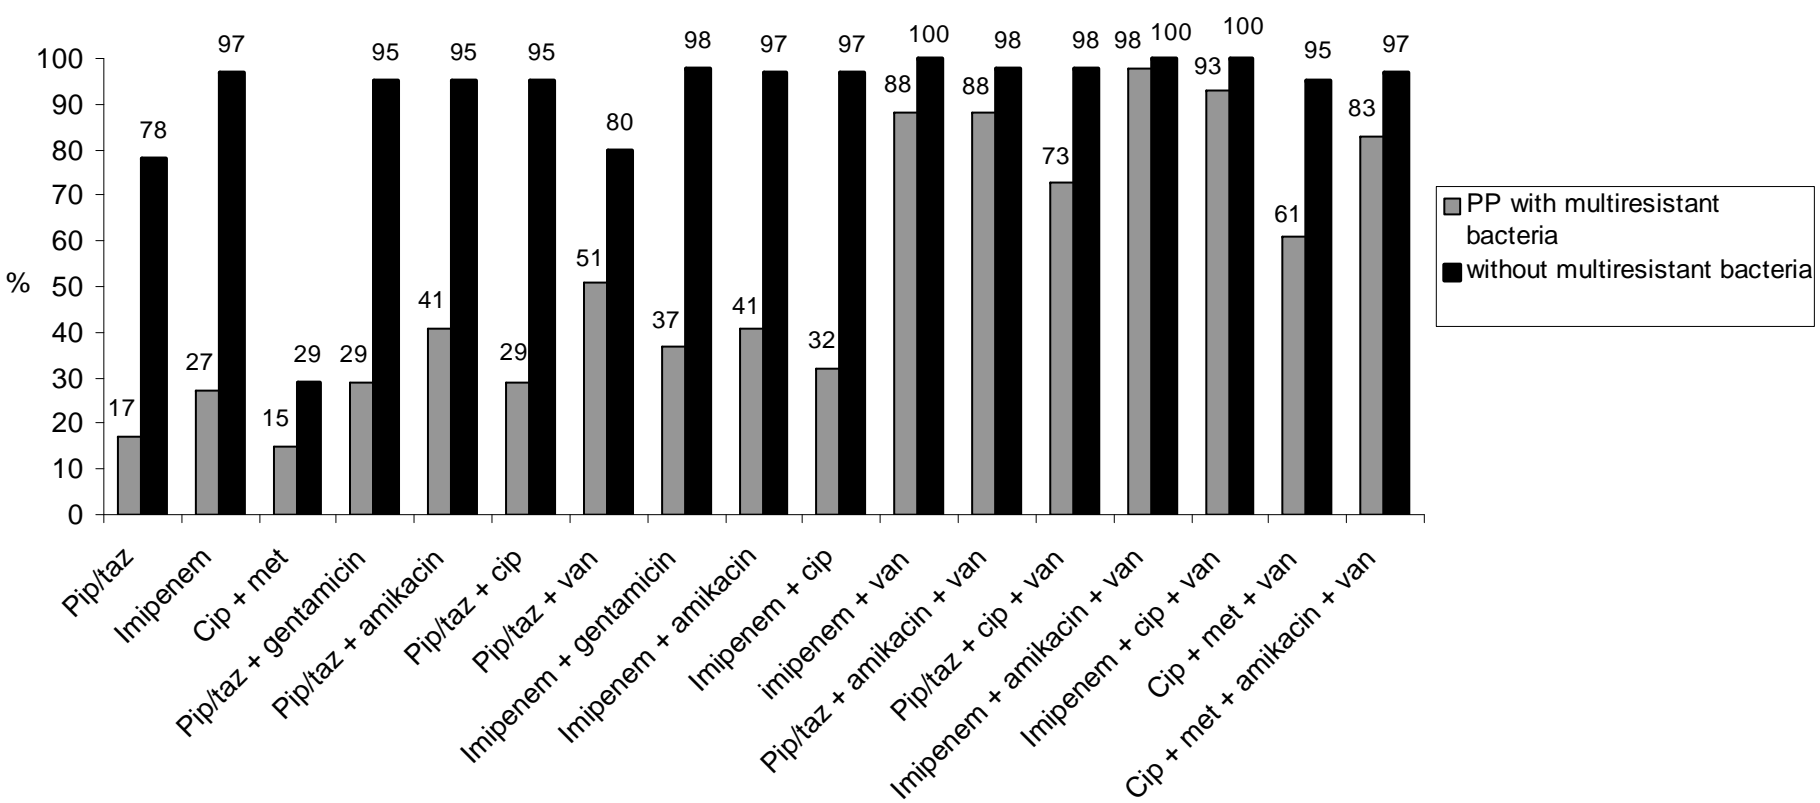

Supplement: MOESM1 [file 9731670]
